# Supplementary material for: Species Designations Belie Phenotypic and Genotypic Heterogeneity in Oral Streptococci
Source: PubMed Central journal article supplement (PMC6299155; doi:10.1128/msystems.00158-18), 2018-12-18

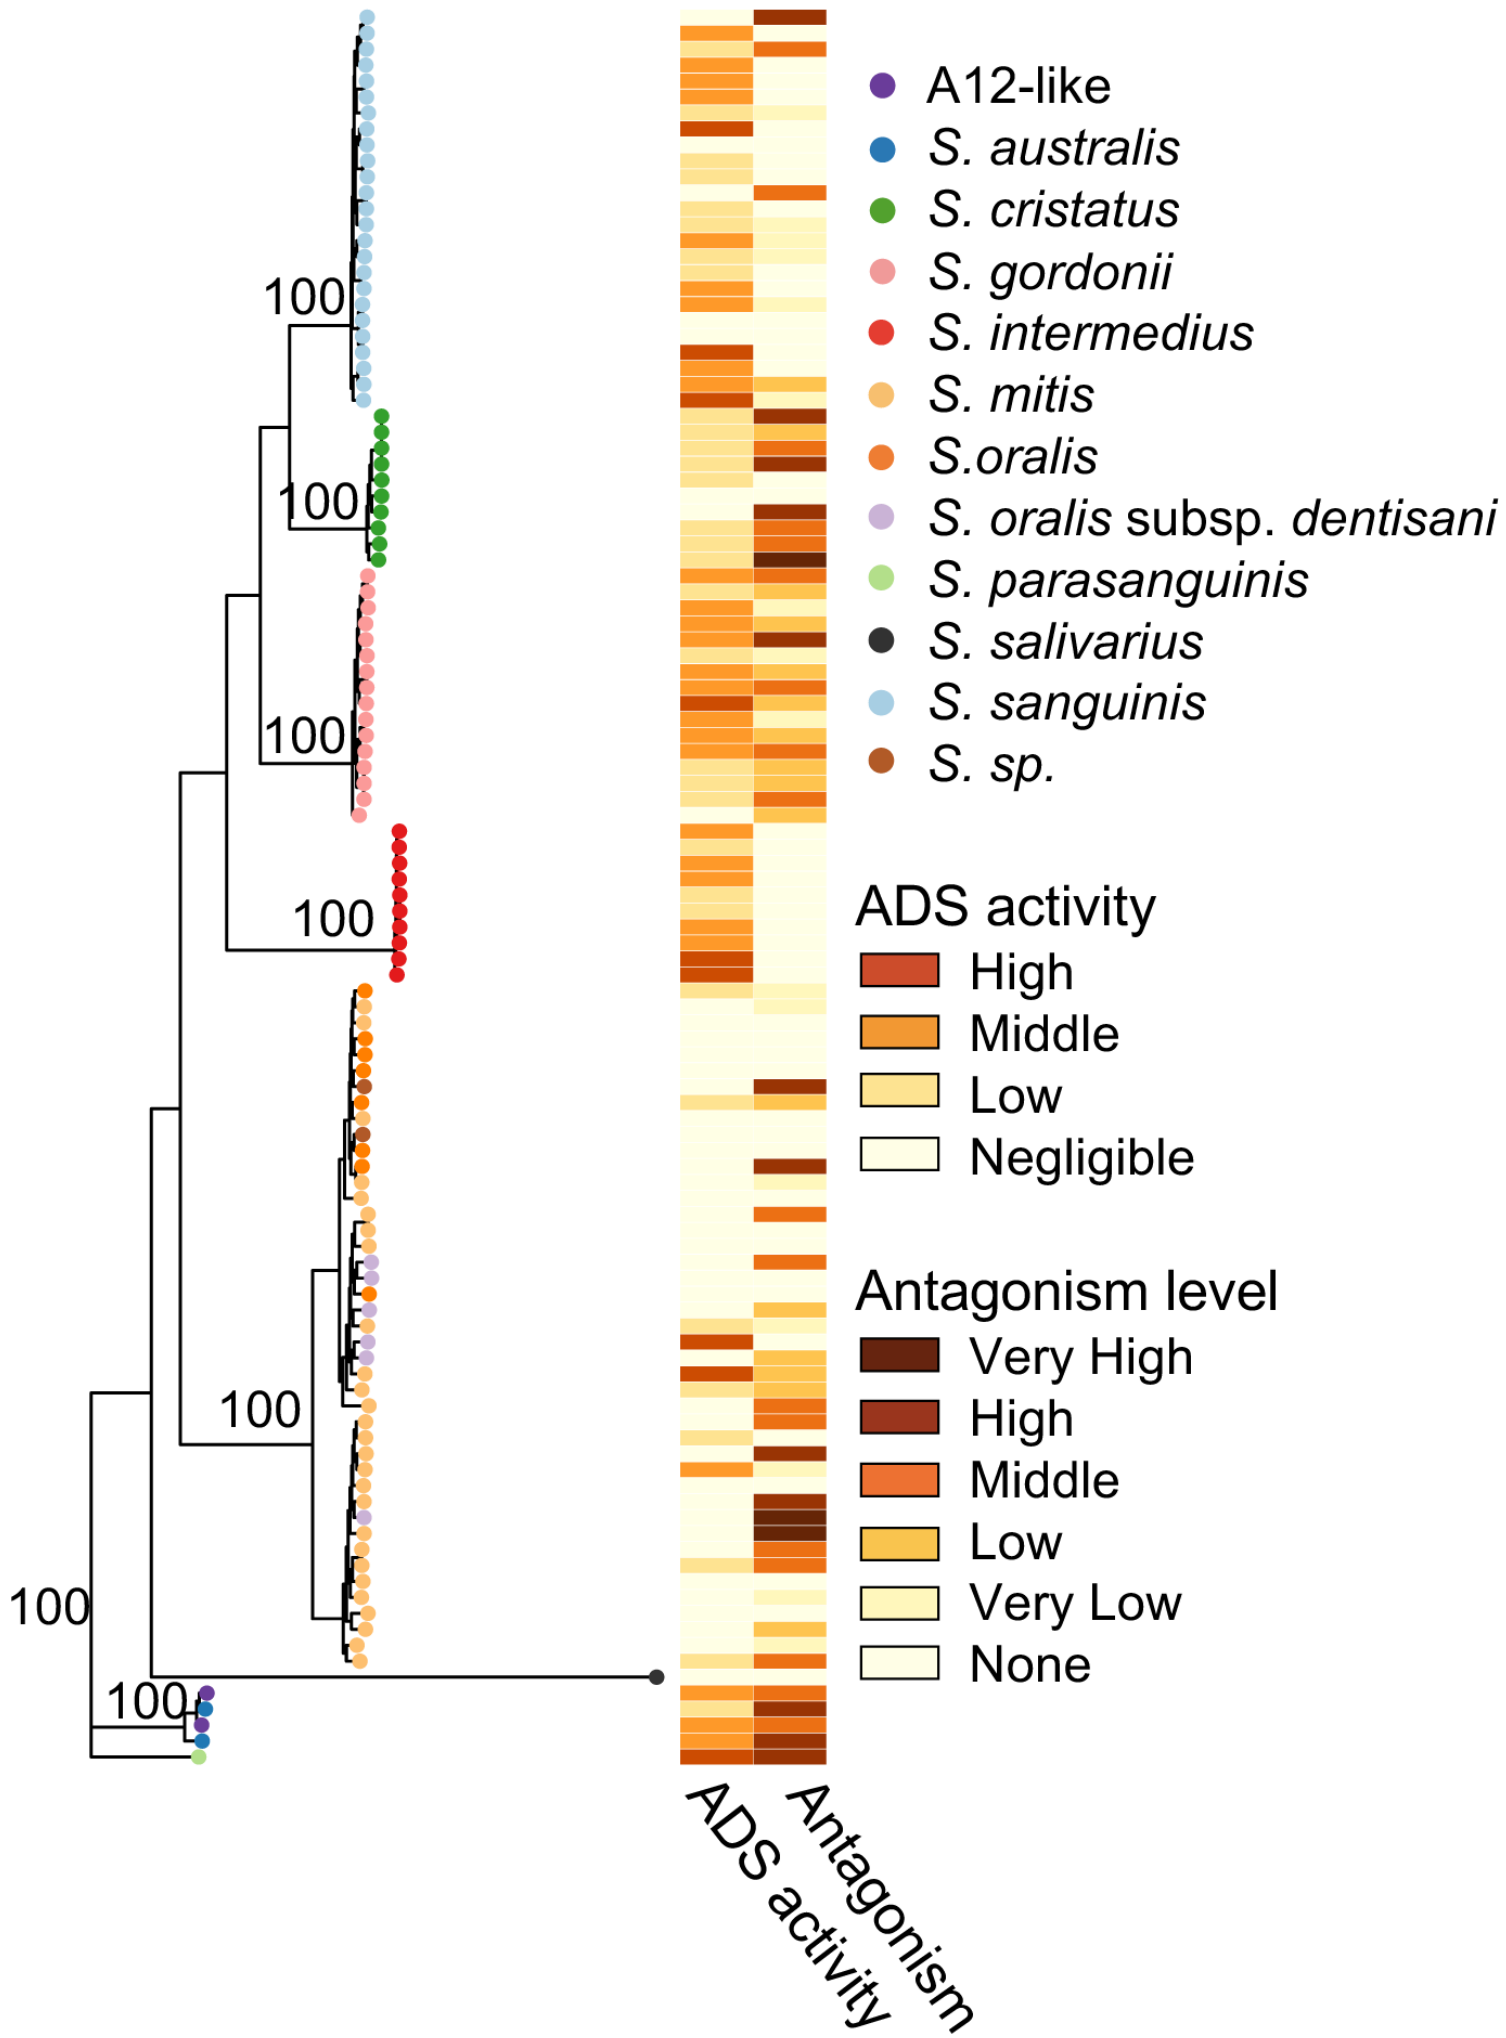

Supplement: sys006182304sf1.pdf [file sys006182304sf1.pdf]
