# Supplementary material for: Species Designations Belie Phenotypic and Genotypic Heterogeneity in Oral Streptococci
Source: PubMed Central journal article supplement (PMC6299155; doi:10.1128/msystems.00158-18), 2018-12-18
Supplement: sys006182304sf4.pdf [file sys006182304sf4.pdf]

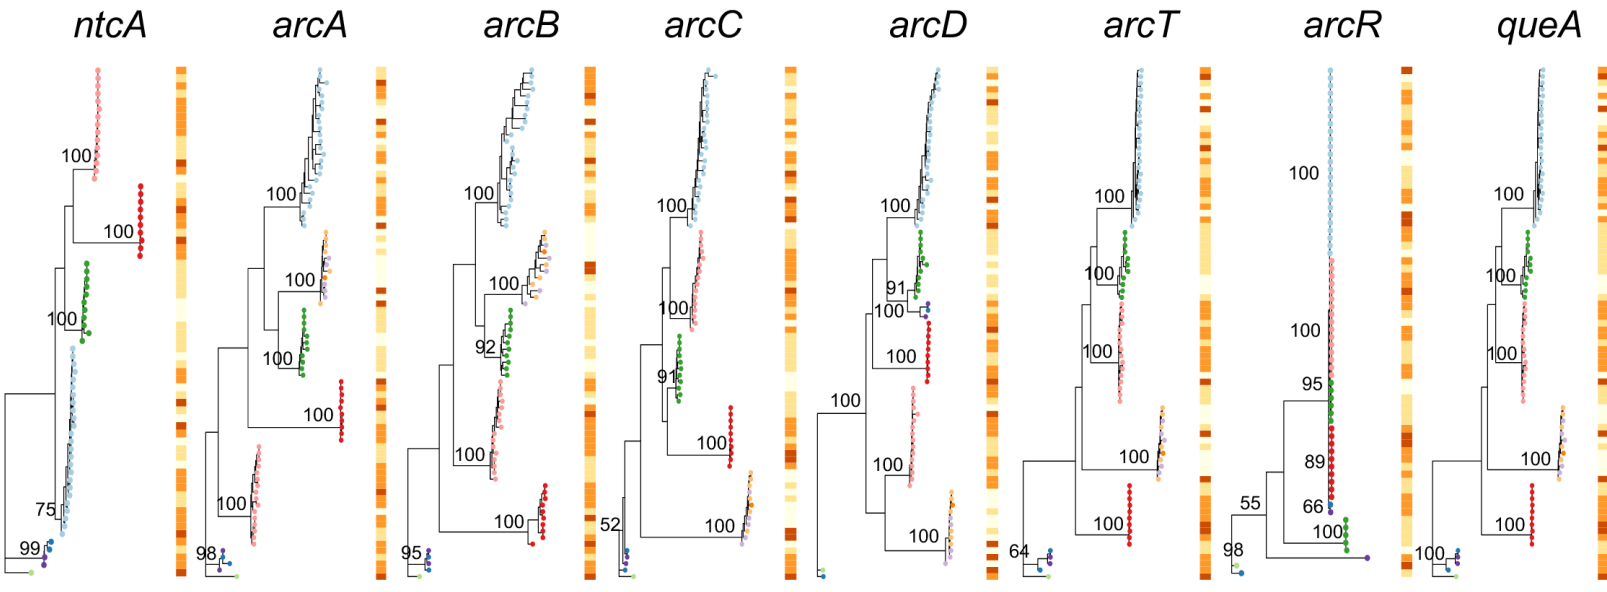

- A12-like
- *S. australis*
- *S. cristatus*
- *S. gordonii*
- *S. intermedius*
- *S. mitis*
- *S. oralis*
- *S. oralis* subsp. *dentisani*
- *S. parasanguinis*
- *S. sanguinis*

- ADS activity level
- High
  - Middle
  - Low
  - Negligible
